# Supplementary material for: Landscape of Mitochondria Genome and Clinical Outcomes in Stage 1 Lung Adenocarcinoma
Source: Cancers (Basel). 2020 Mar 23;12(3):755. doi: 10.3390/cancers12030755 (PMC7140061; doi:10.3390/cancers12030755)
Supplement: Supplementary file 1 [file cancers-12-00755-s001.pdf]

**Supplementary Material: Landscape of Mitochondria Genome and Clinical Outcomes in Stage 1 Lung adenocarcinoma**

**Table S1:** External cohorts used for mitochondrial nucleotide substitution profiles and mutation frequency estimation

| Cancer Type                            | Sequencing | #Samples | References |
|----------------------------------------|------------|----------|------------|
| Acute Lymphocytic Leukemia             | WES+WGS    | 70       | [33]       |
| Acute Myeloid Leukemia                 | WES+WGS    | 81       | [33,54]    |
| Adenoid Cystic Carcinoma               | WES+WGS    | 61       | [33]       |
| Bladder                                | WGS        | 54       | [33]       |
| Breast                                 | WES+WGS    | 382      | [33]       |
| Cervical                               | WES        | 52       | [33]       |
| Cholangiocarcinoma*                    | WES        | 59       | [33,42]    |
| Chondrosarcoma                         | WES        | 47       | [33]       |
| Chordoma                               | WES+WGS    | 27       | [33]       |
| Colan adenocarcinoma                   | WES        | 86       | [54]       |
| Colorectal                             | WES+WGS    | 76       | [33]       |
| Ewing sarcoma                          | WES        | 27       | [33]       |
| Gastric                                | WES        | 13       | [33]       |
| Glioblastoma                           | WES        | 32       | [54]       |
| Head & Neck                            | WES+WGS    | 46       | [33]       |
| Hepatocellular                         | WES        | 47       | [33]       |
| Liver Hepatocellular Carcinoma*        | WES        | 442      | [55]       |
| Kidney Chromophobe*                    | WES        | 66       | [56]       |
| Kidney Renal Papillary Cell Carcinoma* | WES        | 293      | [57]       |
| Liver Hepatocellular Carcinoma         | WES        | 442      | [33]       |
| Lung (LUAD-TCGA)                       | WGS        | 60       | [33]       |
| Lung Squamous Cell Carcinoma (LUSC_KR) | WES        | 88       | [58]       |
| Melanoma                               | WES+WGS    | 26       | [33]       |

|                                   |         |     |      |
|-----------------------------------|---------|-----|------|
| Multiple myeloma                  | WES     | 69  | [33] |
| Myelodysplastic Syndromes         | WES+WGS | 78  | [33] |
| Myeloproliferative Disorders      | WES+WGS | 150 | [33] |
| Osteosarcoma                      | WES+WGS | 128 | [33] |
| Ovarian                           | WES     | 38  | [33] |
| Ovarian Serous Cystadenocarcinoma | WES     | 28  | [54] |
| Prostate                          | WGS     | 80  | [33] |
| Rectal adenocarcinoma             | WES     | 43  | [54] |
| Renal                             | WES     | 23  | [33] |
| Testicular Germ Cell Cancer       | WES     | 156 | [55] |
| Uterine                           | WES+WGS | 50  | [33] |

---

Studies marked with \* provided coding region somatic variants only, thus were not included in germline analysis

**Table S2:** External cohorts used for comparison of nuclear genome somatic nucleotide substitution profile

|                          | Remarks                              | #Samples | Ref. |
|--------------------------|--------------------------------------|----------|------|
| Broad Institute          | Lung adenocarcinoma dataset          | 182      | [30] |
| MSKCC                    | Lung adenocarcinoma dataset          | 34       | [59] |
| TCGA LUAD                | Lung adenocarcinoma dataset          | 566      | [60] |
| TSP LUAD                 | Lung adenocarcinoma dataset          | 153      | [61] |
| MSK Impact*              | Filtered lung adenocarcinoma samples | 1,277    | [62] |
| NSCLC (Govindan et al. ) | Filtered lung adenocarcinoma samples | 9        | [63] |

\*MSK Impact is cancer panel study, with sequencing information of 300 genes

**Table S3:** Summary of identified germline mutations in mitochondrial genome

|                      | #Mutations | %     | AMF  |
|----------------------|------------|-------|------|
| Total mutations      | 2,180      | -     | 2.29 |
| D-loop               | 516        | 23.81 | 8.34 |
| tRNA & rRNA genes    | 327        | 14.97 | 1.94 |
| OXPPOS Complex genes | 1,327      | 60.76 | 1.62 |
| Complex-I genes      | 653        | 49.21 | 1.73 |
| Complex-III genes    | 274        | 20.65 | 3.97 |
| Complex-IV genes     | 253        | 19.07 | 1.4  |
| Complex-V genes      | 147        | 11.08 | 2.73 |

\*AMF is average mutation frequency (per kbp) for corresponding genomic region and is calculated as the total number of mutations divided by the length of mitochondrial genomic region.

**Table S4:** Distribution and nature of germline mutations in mitochondrial encoded OXPHOS complex genes

| Type of mutations | Complex-I(%) | Complex-III(%) | Complex-IV(%) | Complex-V(%) |
|-------------------|--------------|----------------|---------------|--------------|
| Missense          | 172 (27)     | 133 (49)       | 25 (10)       | 134 (91)     |
| Synonymous        | 476 (73)     | 142 (42)       | 227 (90)      | 13 (9)       |
| Others            | 2 (0)        | 0              | 1 (0)         | 0            |
| Total # Mutations | 653          | 274            | 253           | 148          |

**Table S5:** Identified haplogroups and lineages in 61 lung adenocarcinoma patients

| Haplogroup | Lineage | # Patients |
|------------|---------|------------|
| M          | M7      | 11         |
|            | D       | 12         |
|            | C7      | 3          |
|            | M8      | 3          |
|            | G       | 2          |
|            | E1      | 1          |
|            | M9      | 2          |
| N          | B4      | 6          |
|            | N9      | 3          |
|            | B5      | 4          |
|            | A       | 2          |
|            | F       | 12         |

**Table S6:** Summary of identified somatic mutations in mitochondrial genome

|                      | #Mutations | %     | AMF  |
|----------------------|------------|-------|------|
| Total mutations      | 284        | -     | 0.28 |
| D-loop               | 21         | 7.39  | 0.31 |
| tRNA & rRNA genes    | 65         | 22.89 | 0.27 |
| OXPHOS Complex genes | 198        | 69.72 | 0.29 |
| Complex-I genes      | 117        | 59.09 | 0.3  |
| Complex-III genes    | 20         | 10.1  | 0.29 |
| Complex-IV genes     | 47         | 23.74 | 0.26 |
| Complex-V genes      | 14         | 7.07  | 0.26 |

\*AMF is average mutation frequency (per kbp) for corresponding genomic region and is calculated as the total number of mutations divided by the length of mitochondrial genomic region.

**Table S7:** Distribution and nature of somatic mutations in mitochondrial encoded OXPHOS complex genes

| Type of mutations | Complex-I(%) | Complex-III(%) | Complex-IV(%) | Complex-V(%) |
|-------------------|--------------|----------------|---------------|--------------|
| Missense          | 75 (64)      | 12 (60)        | 31 (66)       | 10 (71)      |
| Synonymous        | 35 (30)      | 6 (30)         | 13 (28)       | 3 (21)       |
| Others            | 7 (6)        | 2 (10)         | 3 (6)         | 1 (7)        |
| Total # Mutations | 117          | 20             | 47            | 14           |

**Table S8:** Multivariate Cox Regression analysis for overall survival

| Variable             | Ad. HR | 95% CI  | P-value |        |
|----------------------|--------|---------|---------|--------|
| D-loop               |        |         |         |        |
| Age                  | 1.0248 | 0.9799  | 1.072   | 0.2842 |
| Sex                  | 0.2225 | 0.04086 | 1.211   | 0.0822 |
| EGFR mutation        | 1.3638 | 0.38684 | 4.808   | 0.6293 |
| Tumor Size           | 1.4951 | 0.43144 | 5.181   | 0.5259 |
| Smoking Status       | 3.807  | 1.1614  | 12.479  | 0.0273 |
| D-loop mutation      | 0.4362 | 0.12157 | 1.565   | 0.203  |
| Complex-I            |        |         |         |        |
| Age                  | 1.0065 | 0.9626  | 1.052   | 0.7773 |
| Sex                  | 0.2376 | 0.04396 | 1.285   | 0.0951 |
| EGFR mutation        | 1.3572 | 0.39329 | 4.683   | 0.6289 |
| Tumor Size           | 1.5523 | 0.44294 | 5.44    | 0.4919 |
| Smoking Status       | 3.9423 | 1.16378 | 13.355  | 0.0276 |
| Complex-I mutations  | 1.5364 | 0.4386  | 5.382   | 0.502  |
| Complex-IV           |        |         |         |        |
| Age                  | 1.0081 | 0.96481 | 1.053   | 0.7197 |
| Sex                  | 0.2283 | 0.04086 | 1.276   | 0.0924 |
| EGFR mutation        | 1.3369 | 0.39281 | 4.55    | 0.6422 |
| Tumor Size           | 1.4361 | 0.42501 | 4.853   | 0.5601 |
| Smoking Status       | 3.9716 | 1.21627 | 12.969  | 0.0224 |
| Complex-IV mutations | 1.3586 | 0.46143 | 4       | 0.5781 |
| Complex-V            |        |         |         |        |
| Age                  | 1.0029 | 0.96049 | 1.047   | 0.8965 |
| Sex                  | 0.1727 | 0.03007 | 0.992   | 0.049  |
| EGFR mutation        | 1.4016 | 0.37714 | 5.209   | 0.6142 |
| Tumor Size           | 1.722  | 0.49335 | 6.01    | 0.3941 |
| Smoking Status       | 4.8776 | 1.29789 | 18.33   | 0.019  |

|                            |        |         |        |        |
|----------------------------|--------|---------|--------|--------|
| Complex-V mutations        | 4.0698 | 0.86687 | 19.107 | 0.0753 |
| Complex-IV and Complex-V   |        |         |        |        |
| Age                        | 1.0012 | 0.95667 | 1.048  | 0.9575 |
| Sex                        | 0.1992 | 0.03449 | 1.15   | 0.0713 |
| <i>EGFR</i> mutation       | 1.3216 | 0.39634 | 4.407  | 0.65   |
| Tumor Size                 | 1.6616 | 0.49033 | 5.631  | 0.4148 |
| Smoking Status             | 4.3126 | 1.31586 | 14.134 | 0.0158 |
| Complex-IV and V mutations | 2.283  | 0.75352 | 6.917  | 0.1444 |
| Risk Score                 |        |         |        |        |
| Age                        | 1.0028 | 0.95917 | 1.048  | 0.9008 |
| Sex                        | 0.1992 | 0.03539 | 1.122  | 0.0673 |
| <i>EGFR</i> mutation       | 1.3807 | 0.39578 | 4.817  | 0.6128 |
| Tumor Size                 | 1.5869 | 0.45284 | 5.561  | 0.4705 |
| Smoking Status             | 4.0527 | 1.21822 | 13.482 | 0.0225 |
| Risk Groups                | 2.3519 | 0.82248 | 6.725  | 0.1106 |

---

Ad. HR: Adjusted Hazard Ratio, CI: Confidence Interval

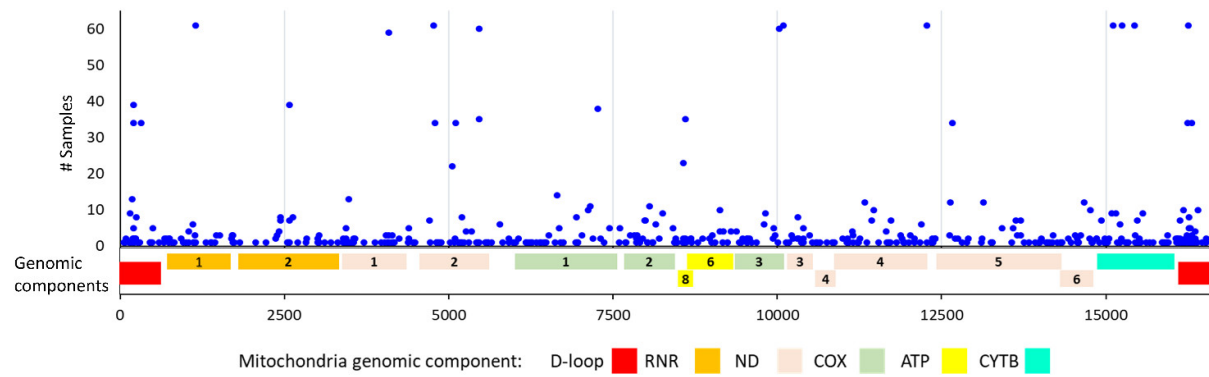

**Figure S1:** Positional distribution of germline mitochondrial variant in lung adenocarcinoma.

Mitochondrial genomic components are represented by different colors.

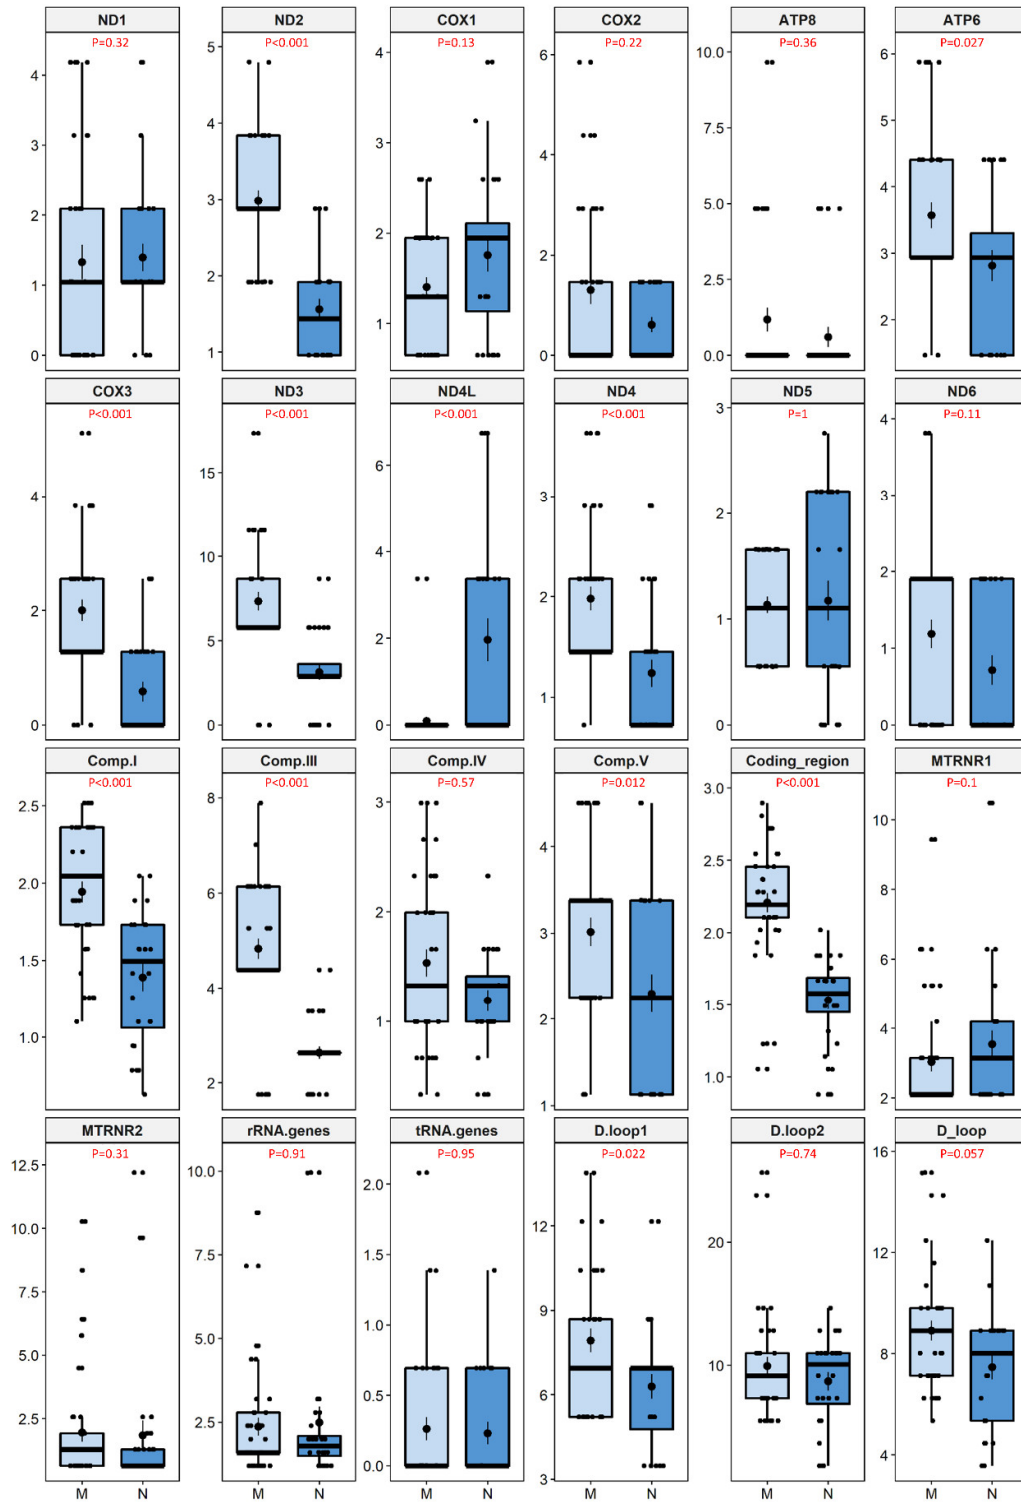

**Figure S2:** Germline mutation frequency of patients from haplogroup M and N: y-axis represents mutation frequency (per kbp) of corresponding gene or region.

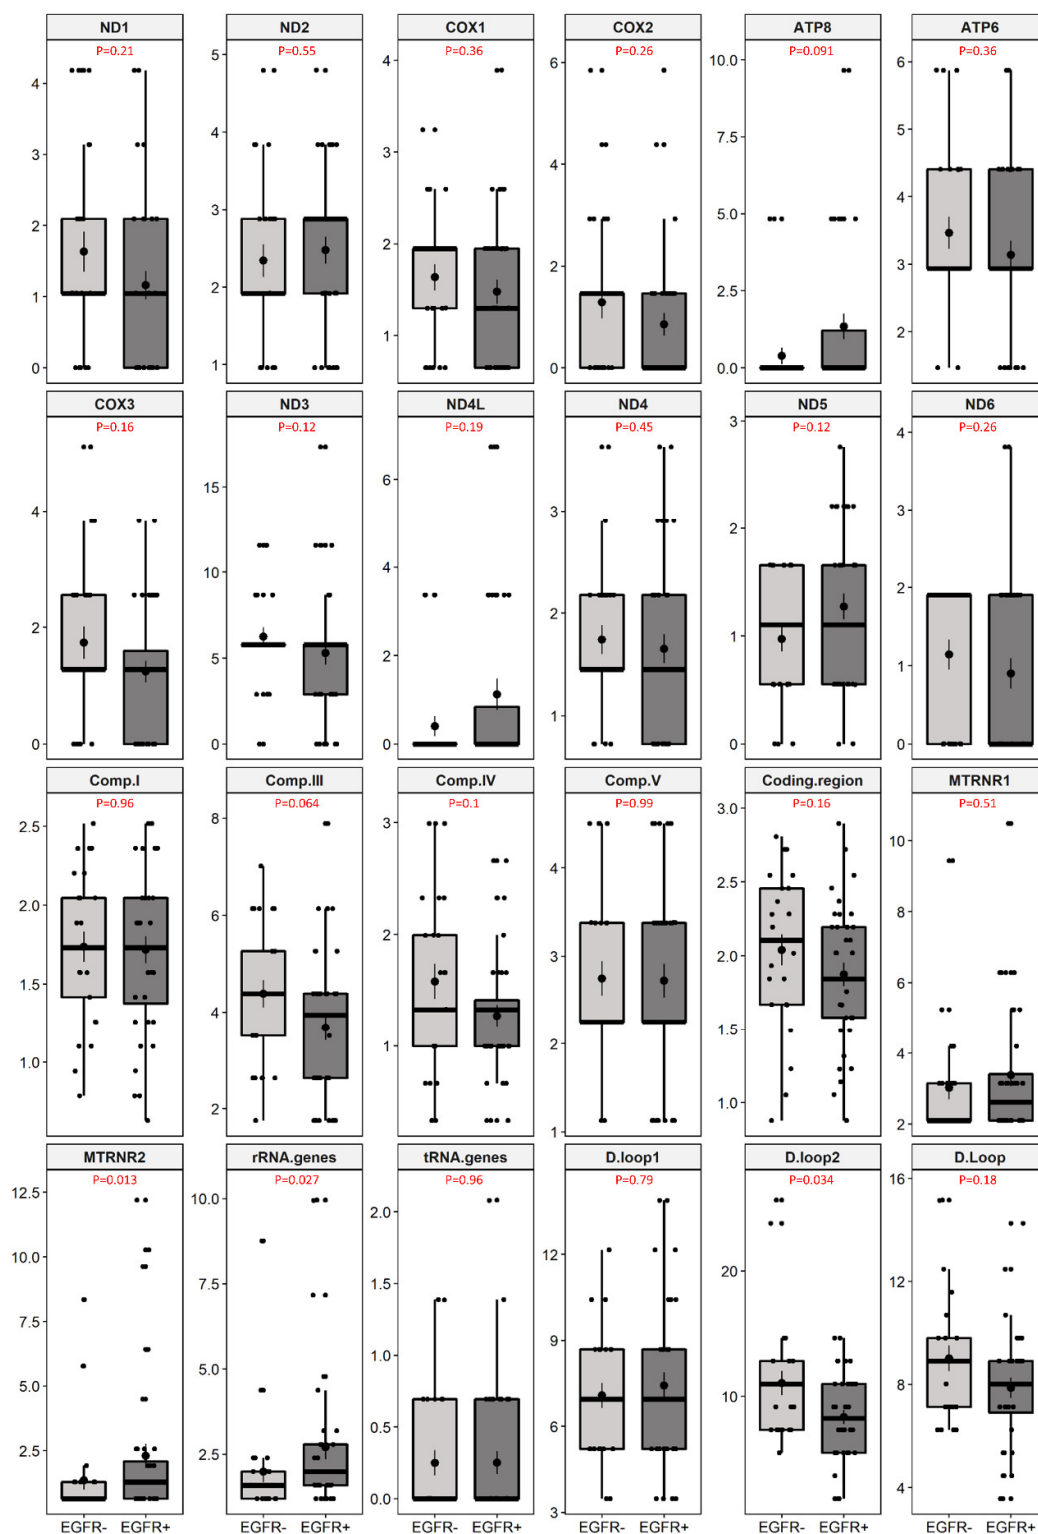

**Figure S3:** Germline mutation frequency of patients with and without *EGFR*-activating mutations (EGFR+ and EGFR- respectively): y-axis is mutation frequency (per kbp) of corresponding gene or region.

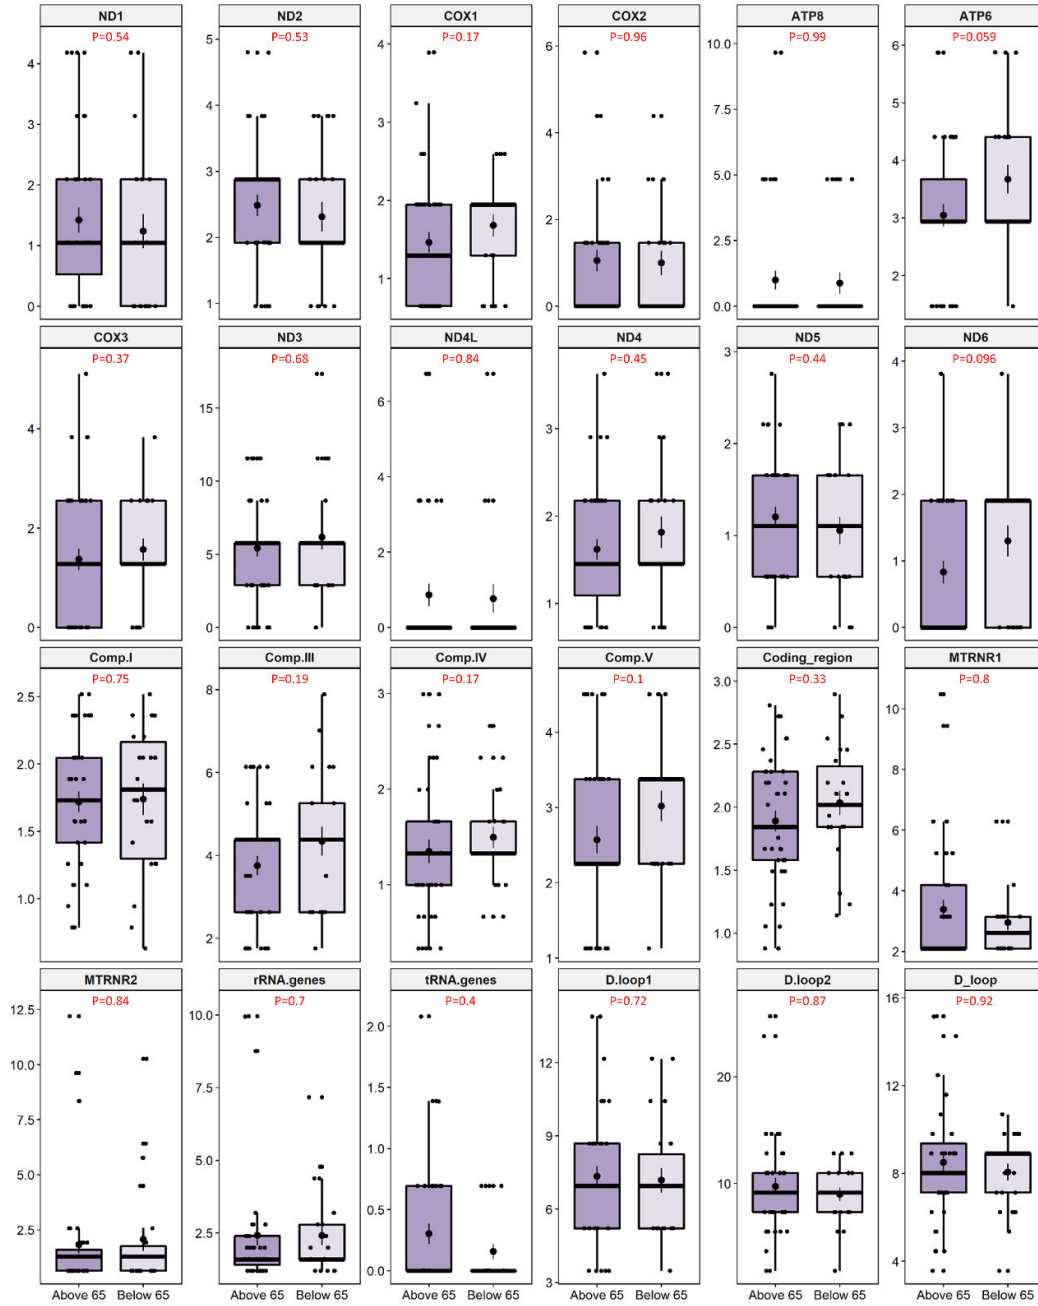

**Figure S4:** Germline mutation frequency among patients of age above and below 65 years. y-axis is mutation frequency (per kbp) of corresponding gene or region.

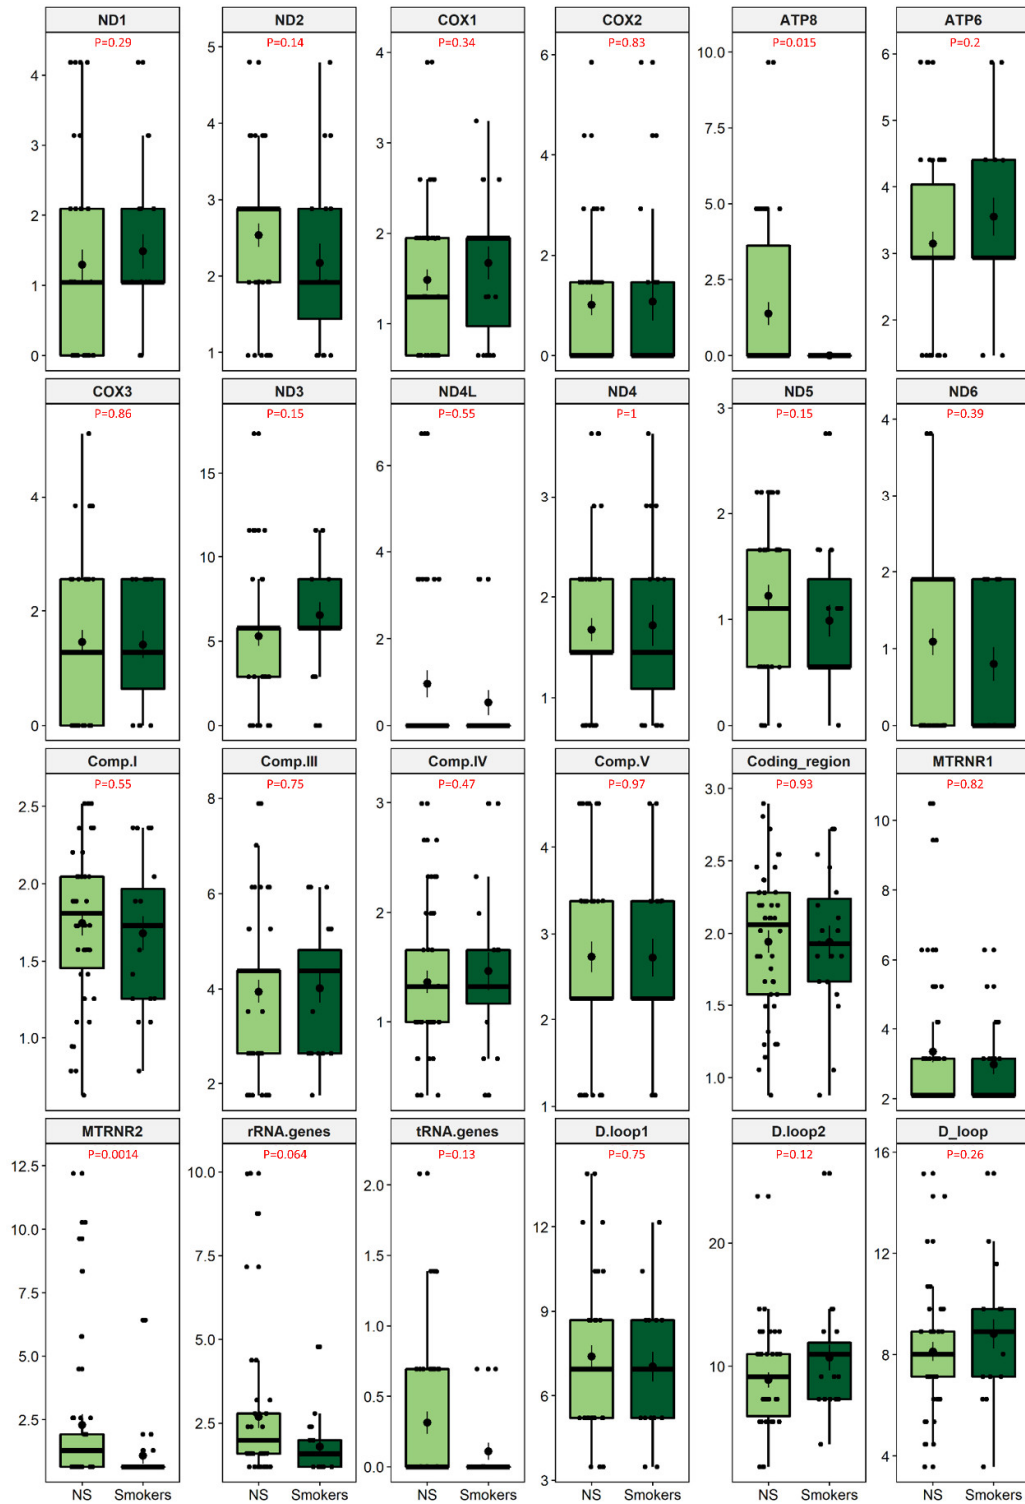

**Figure S5:** Germline mutation frequency among patients of different smoking habits i.e. never smokers and smokers (NS and Smokers, respectively): y-axis is mutation frequency (per kbp) for corresponding gene or region.

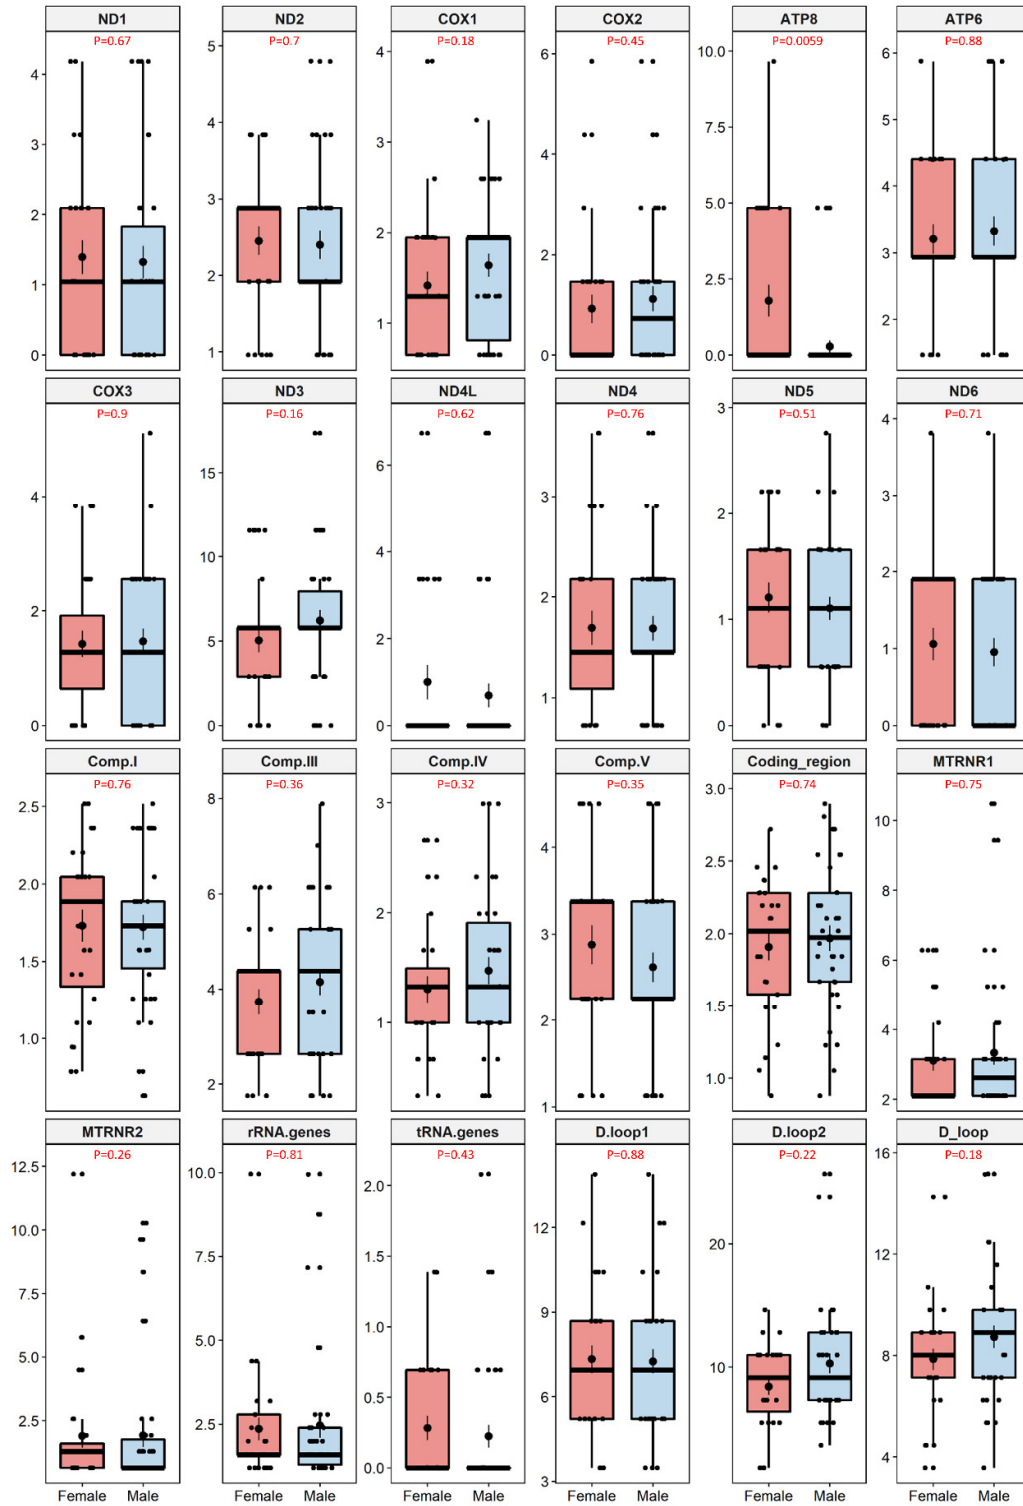

**Figure S6:** Germline mutation frequency among male and female patients: y-axis is mutation frequency (per kbp) of corresponding gene or region

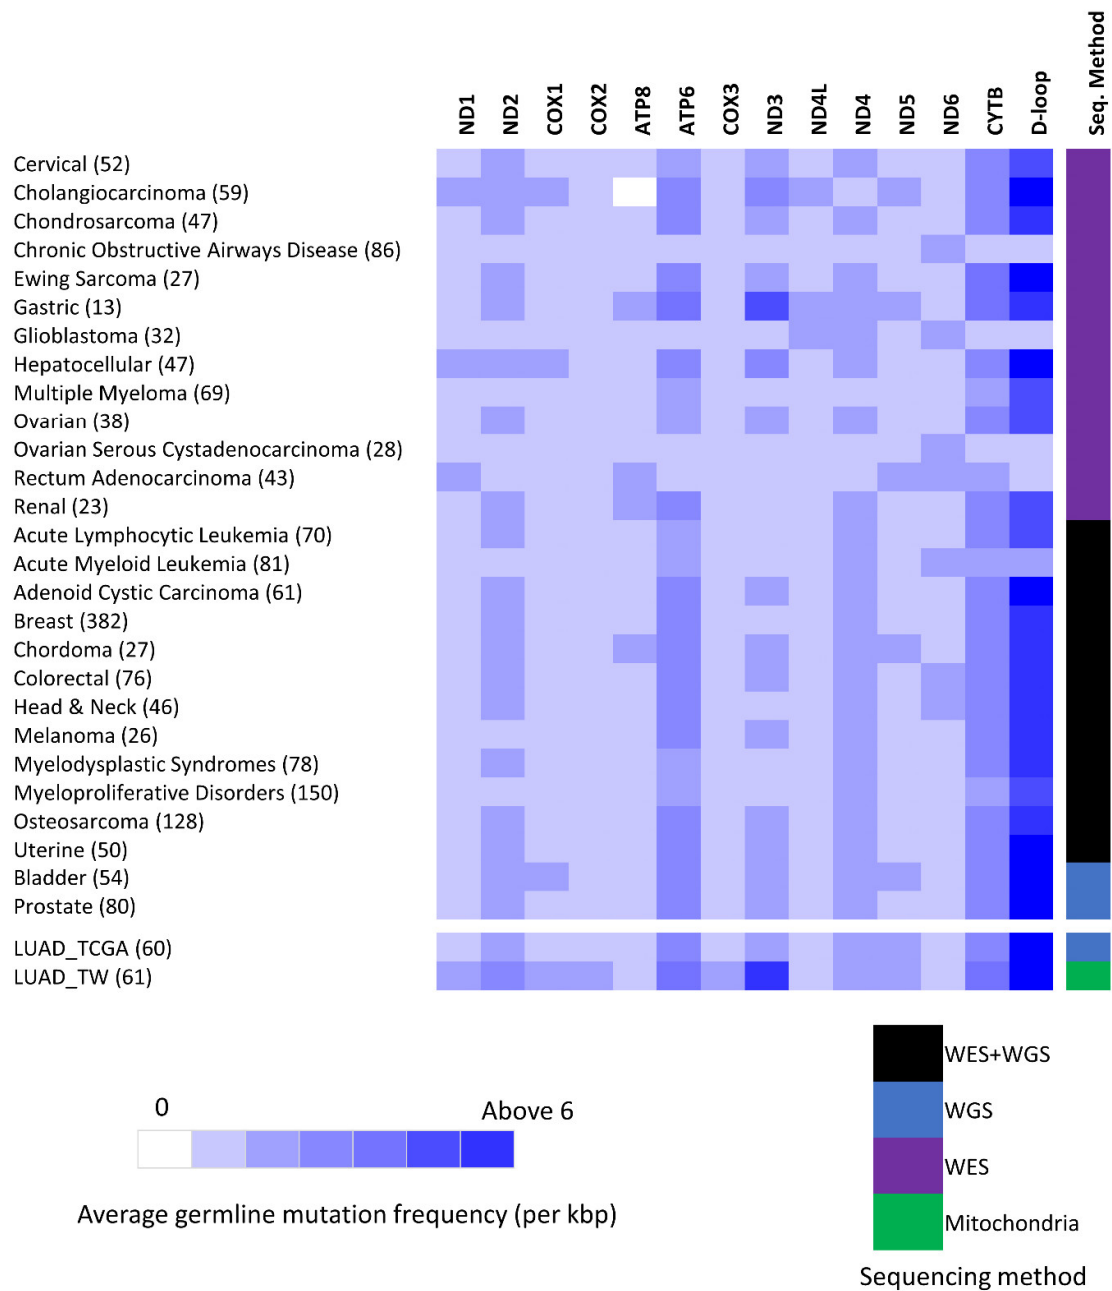

**Figure S7:** Germline mutation frequency (per kbp) of mitochondrial gene among different cancers types and the sequencing methods used.

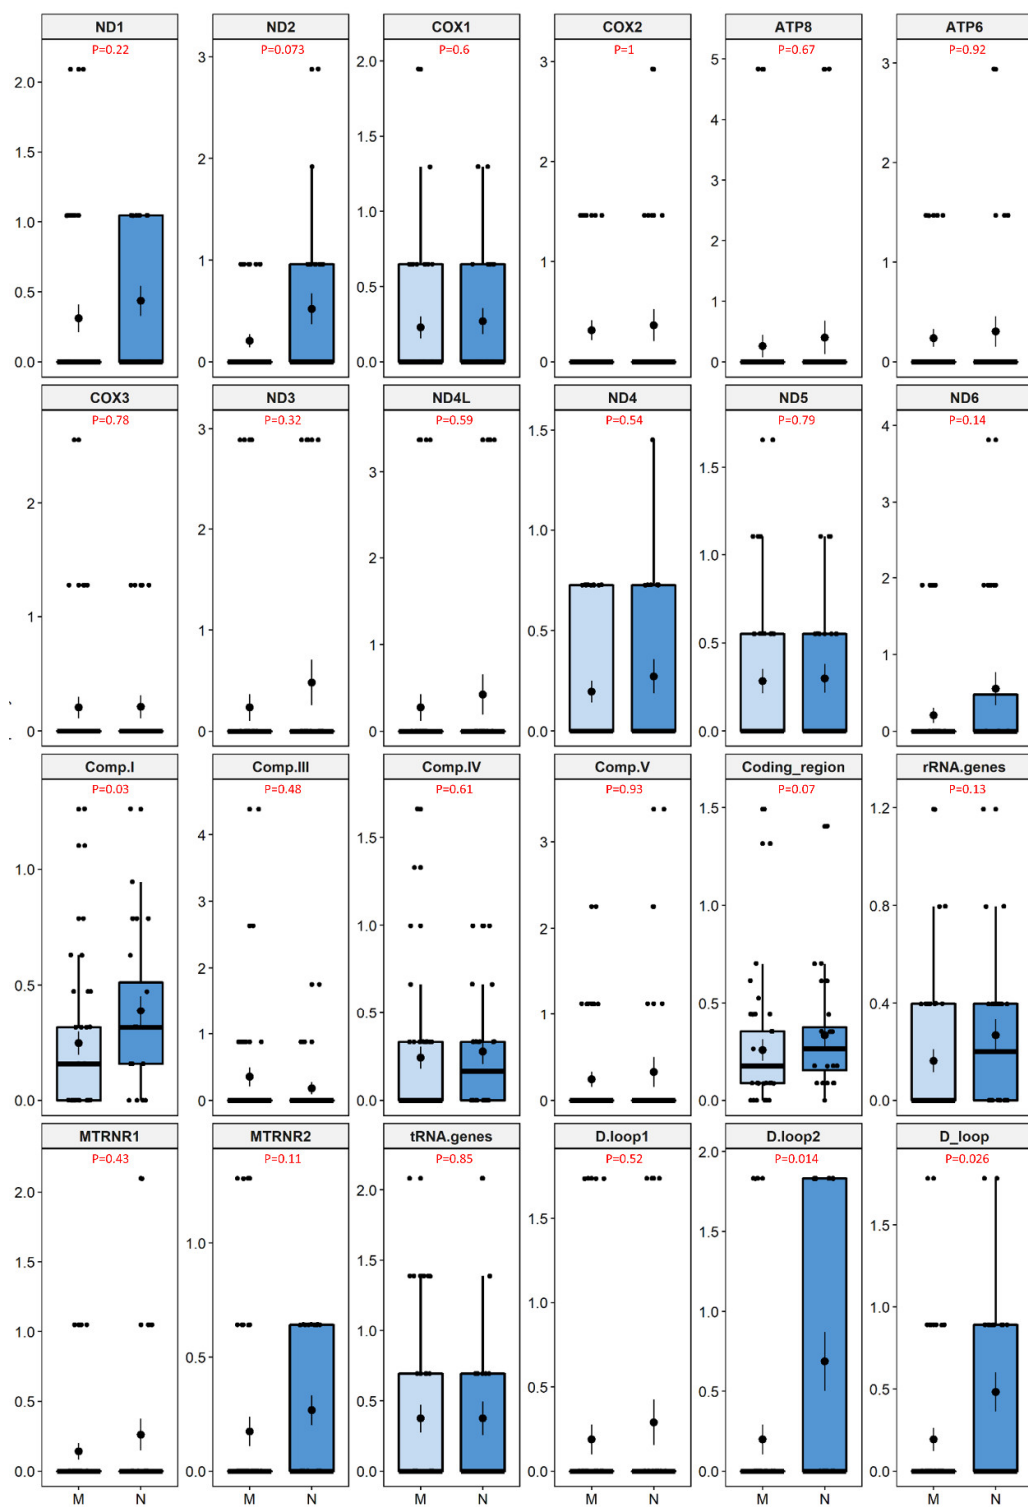

**Figure S8:** Somatic mutation frequency of haplogroup M and N patients: y-axis is mutation frequency (per kbp) of corresponding gene or region.

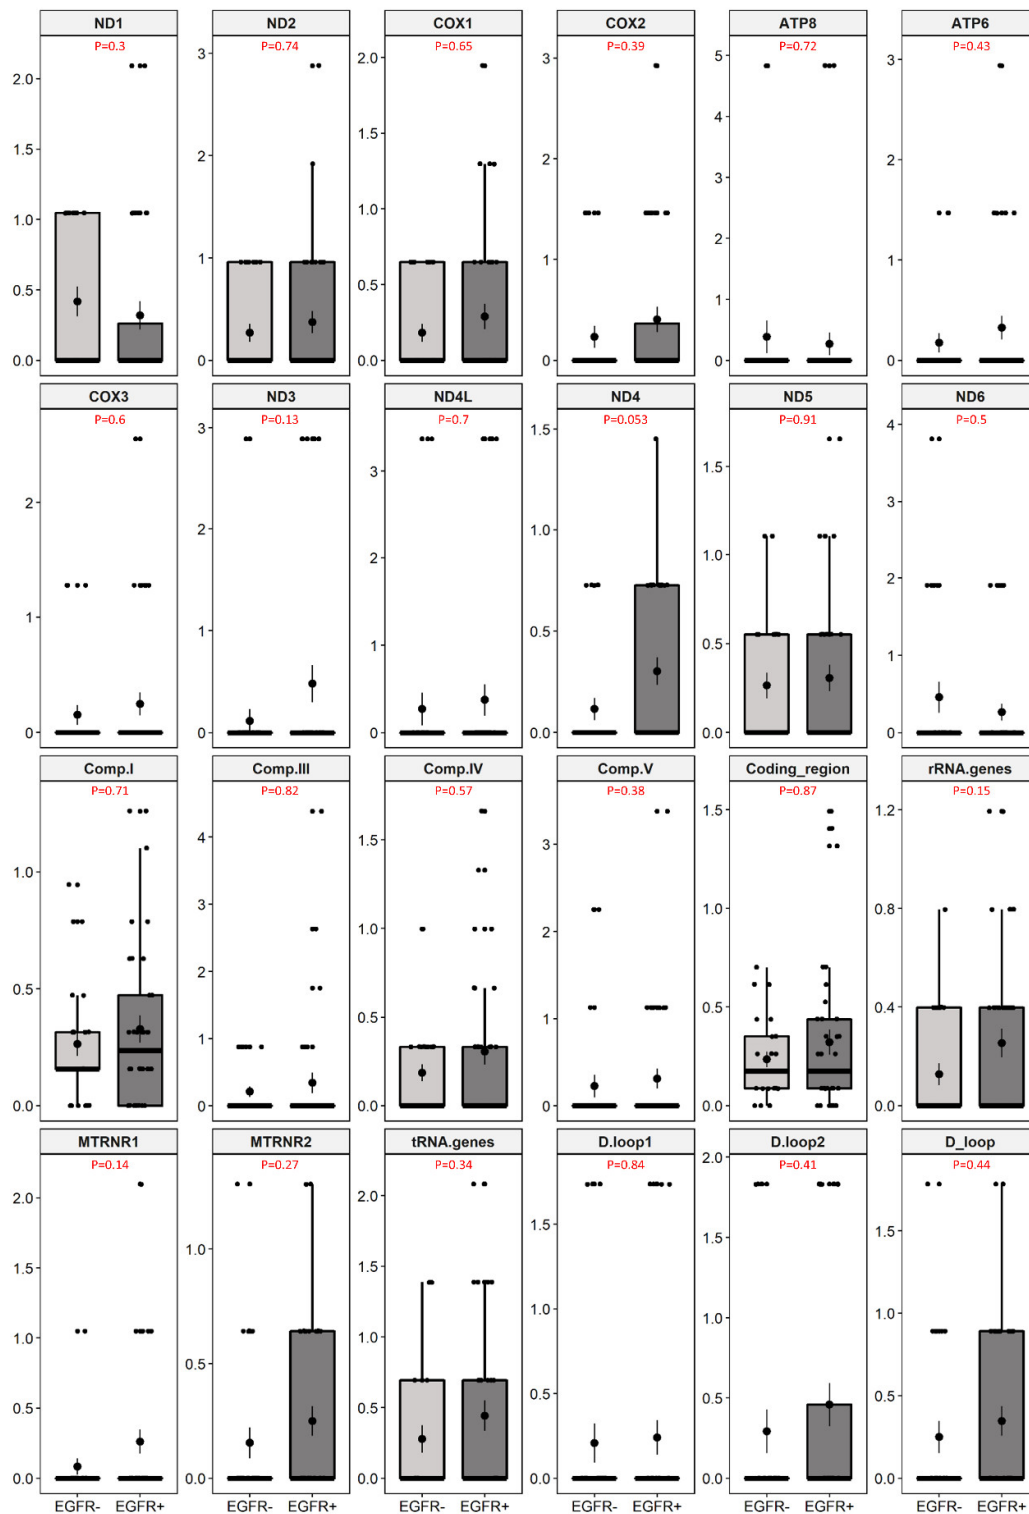

**Figure S9:** Somatic mutation frequency in patients with and without *EGFR*-activating mutations (EGFR+ and EGFR- respectively): y-axis represents mutation frequency (per kbp) of corresponding gene or region.

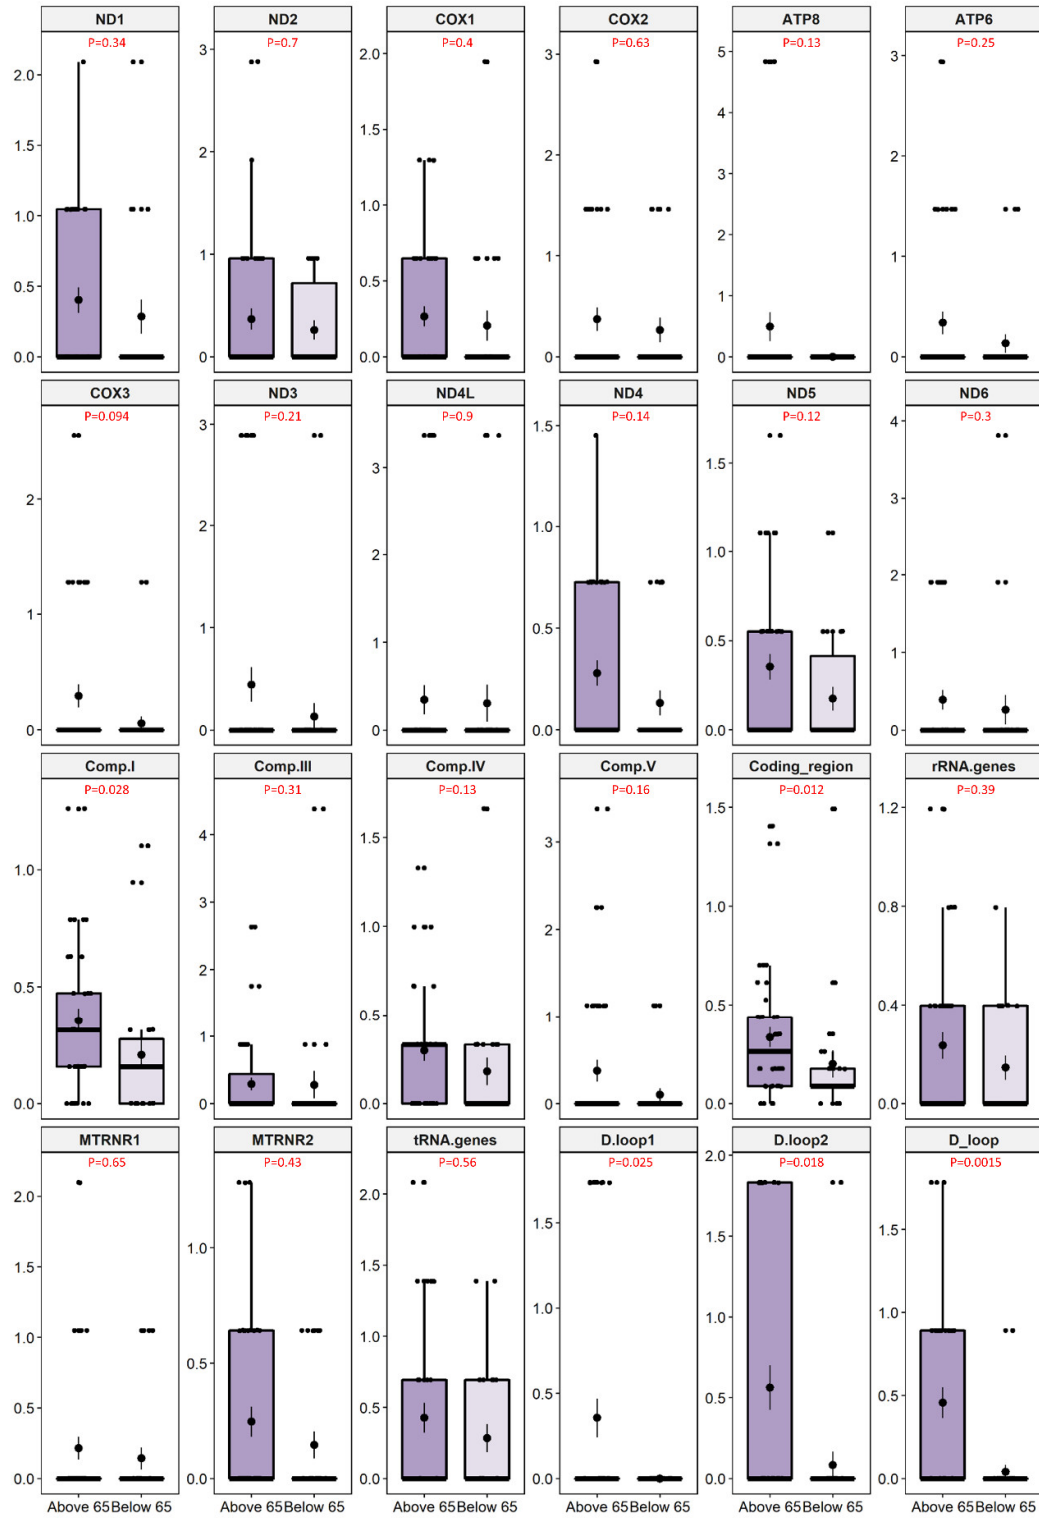

**Figure S10:** Somatic mutation frequency among patients of age above and below 65 years. y-axis is mutation frequency (per kbp) of corresponding gene or region.

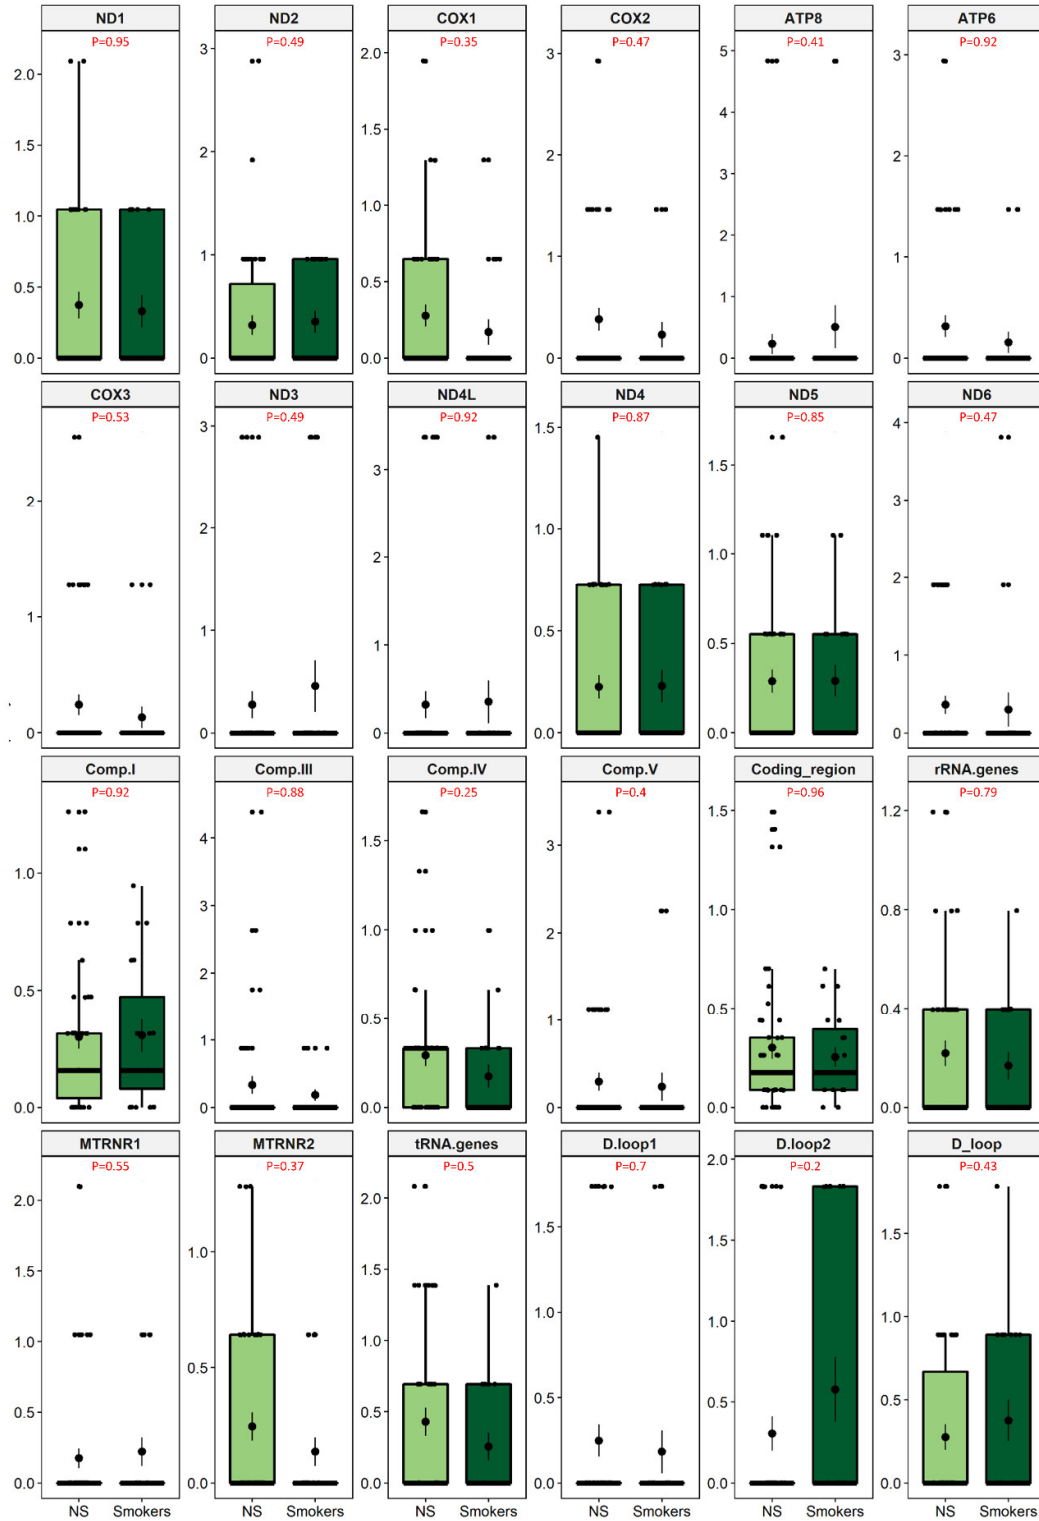

**Figure S11:** Somatic mutation frequency among patients of different smoking habits i.e. never smokers and smokers (NS and Smokers, respectively): y-axis is mutation frequency (per kbp) of corresponding gene or region.

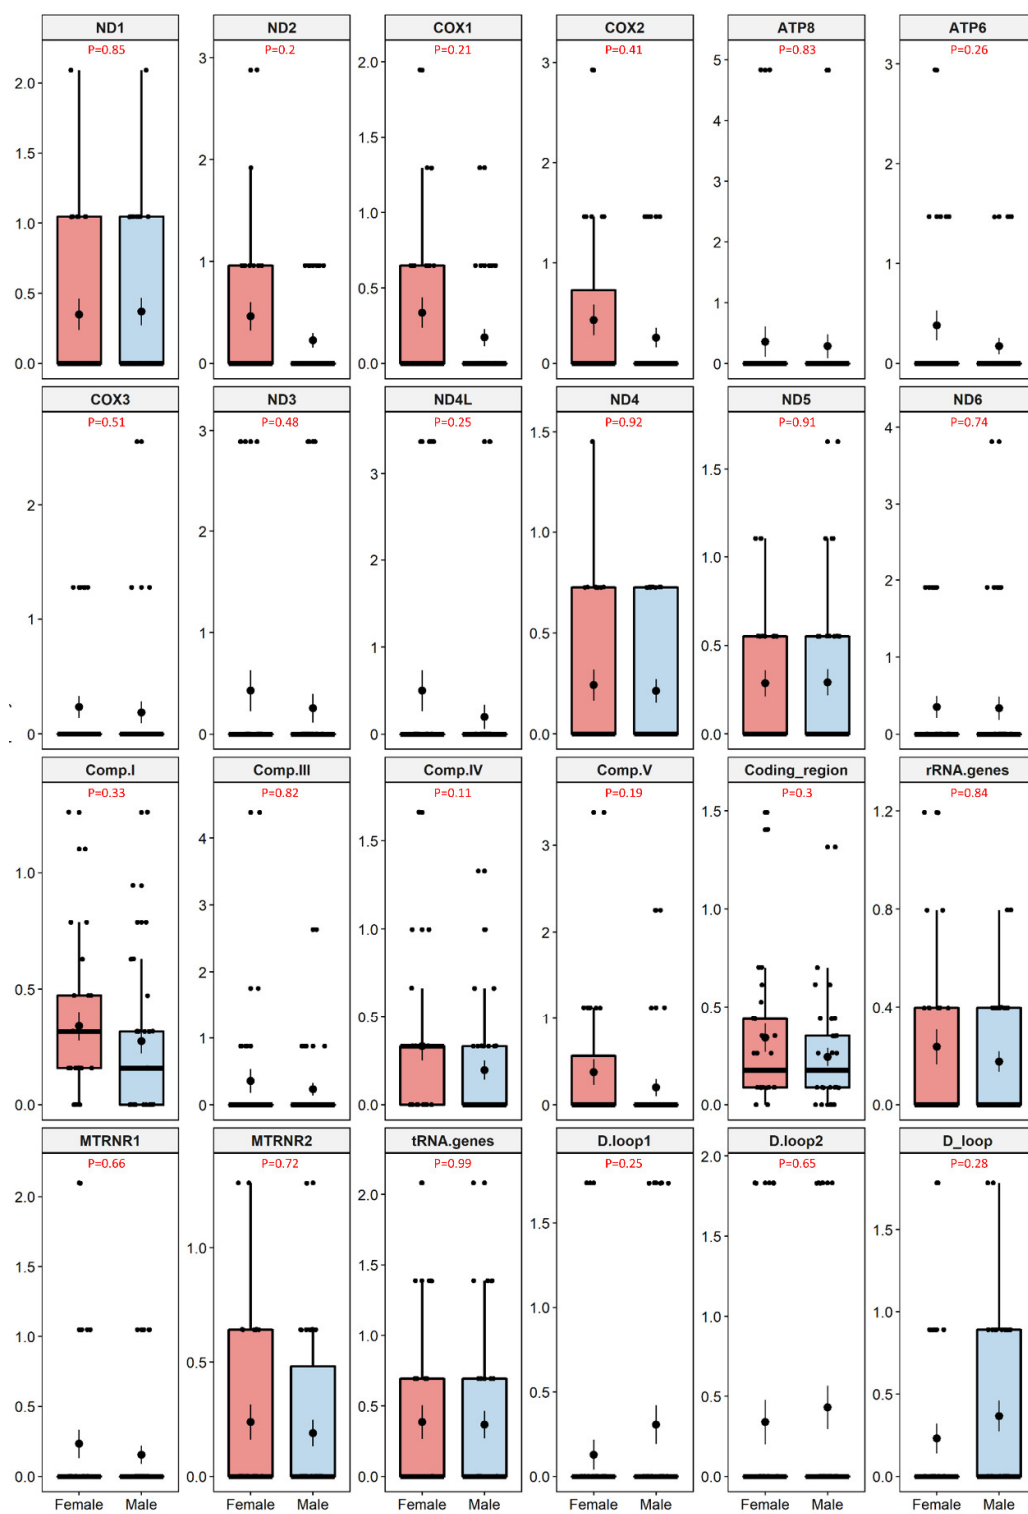

**Figure S12:** Somatic mutation frequency among male and female patients: y-axis is mutation frequency (per kbp) of corresponding gene or region.

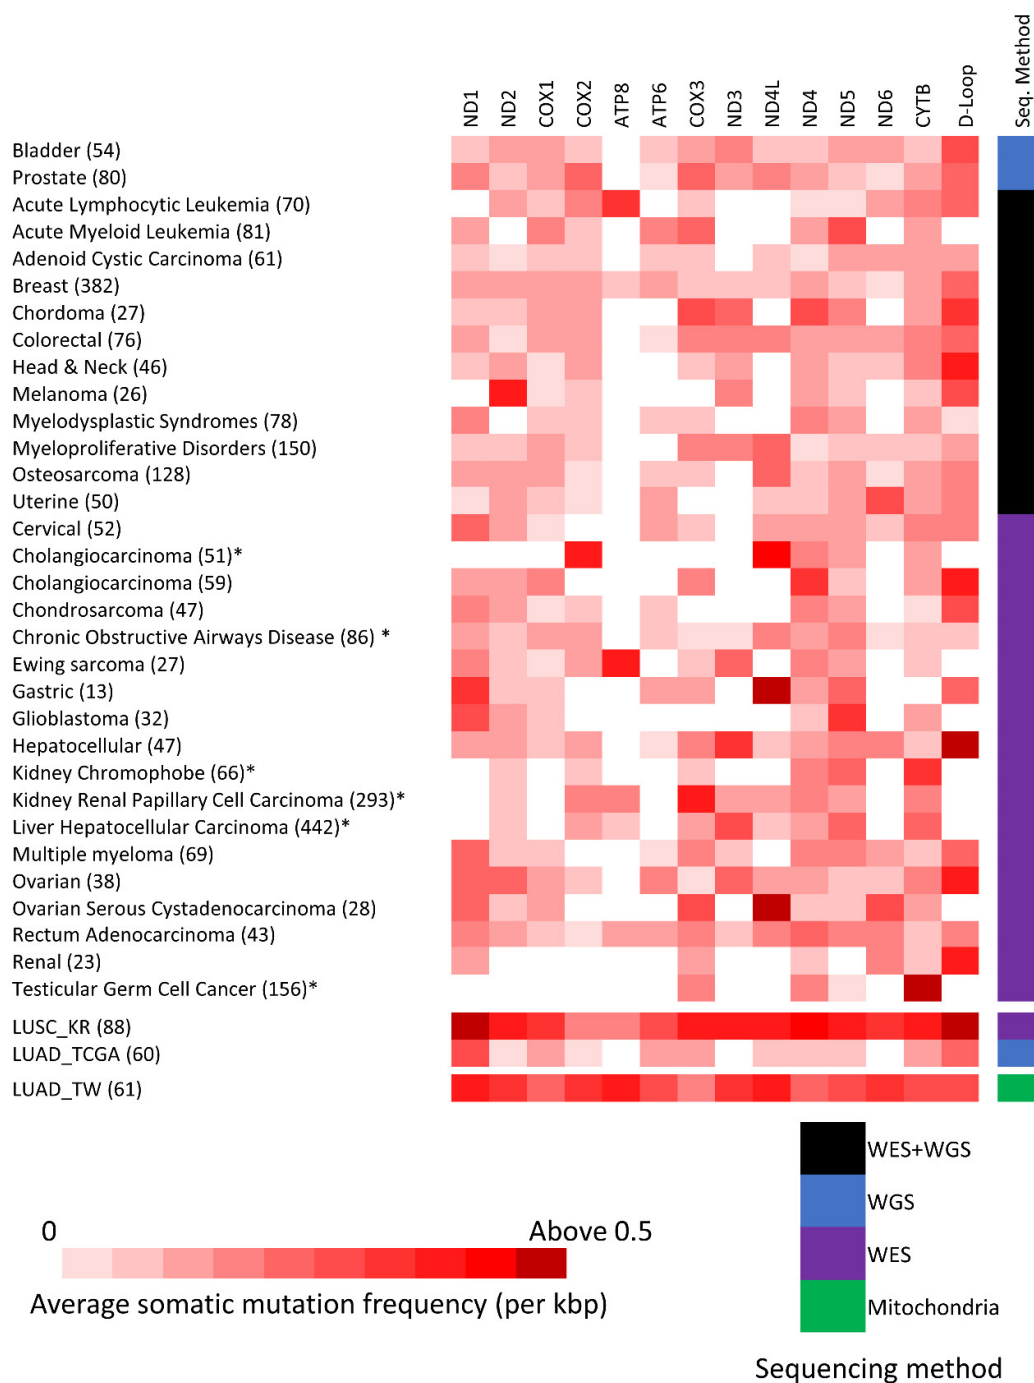

**Figure S13:** Somatic mutation frequency (per kbp) of mitochondrial gene among different cancers types and the different sequencing methods used.

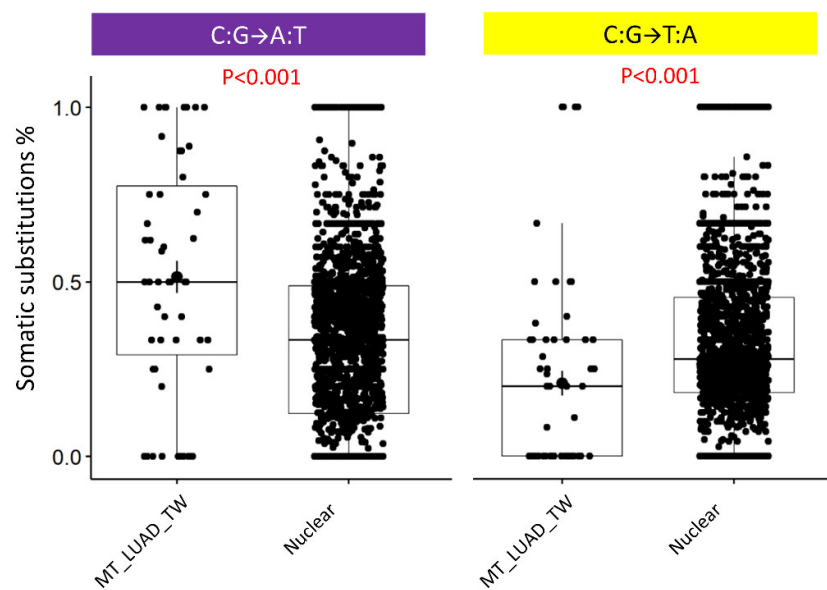

**Figure S14:** Nucleotide substitution profiles of mitochondrial and nuclear genome for C:G→A:T and C:G→T:A substitutions. The nuclear genome data is aggregate of datasets listed in Supplementary Table 2.

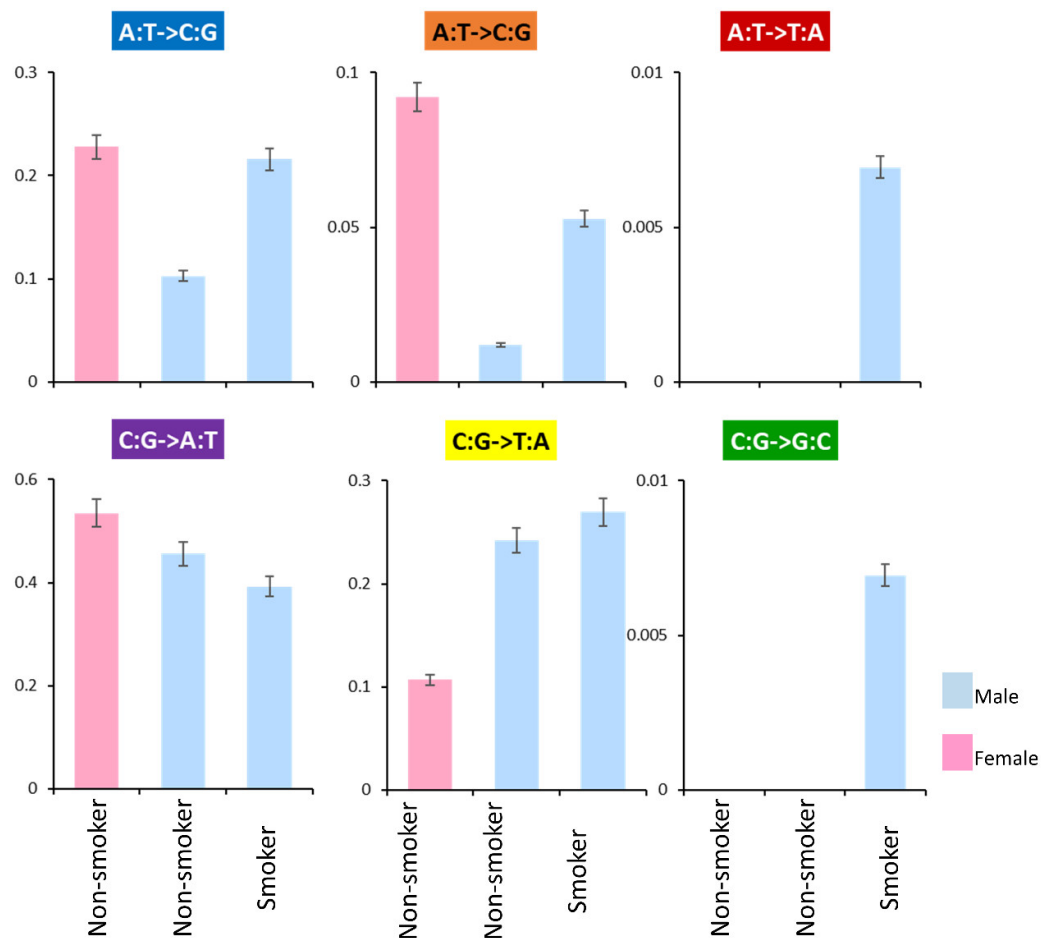

**Figure S15:** Gender wise nucleotide substitution profiles and mutation distribution among smoker and nonsmoker patients: y-axis is average number of nucleotide substitutions within the subgroup. In current study, only one female had smoking history and no nucleotide substitution was observed in this patient.

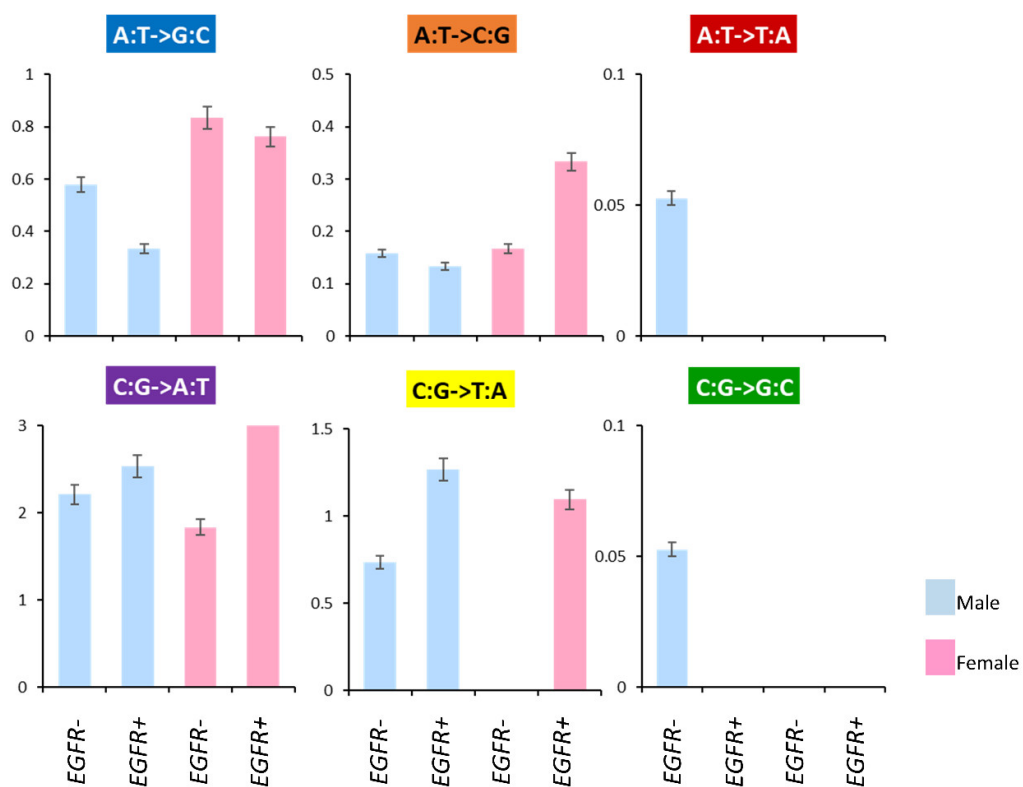

**Figure S16:** Gender wise nucleotide substitution profiles among patients with or without *EGFR* activating mutations (*EGFR*+ and *EGFR*- respectively): y-axis is average number of nucleotide substitutions within the subgroup.

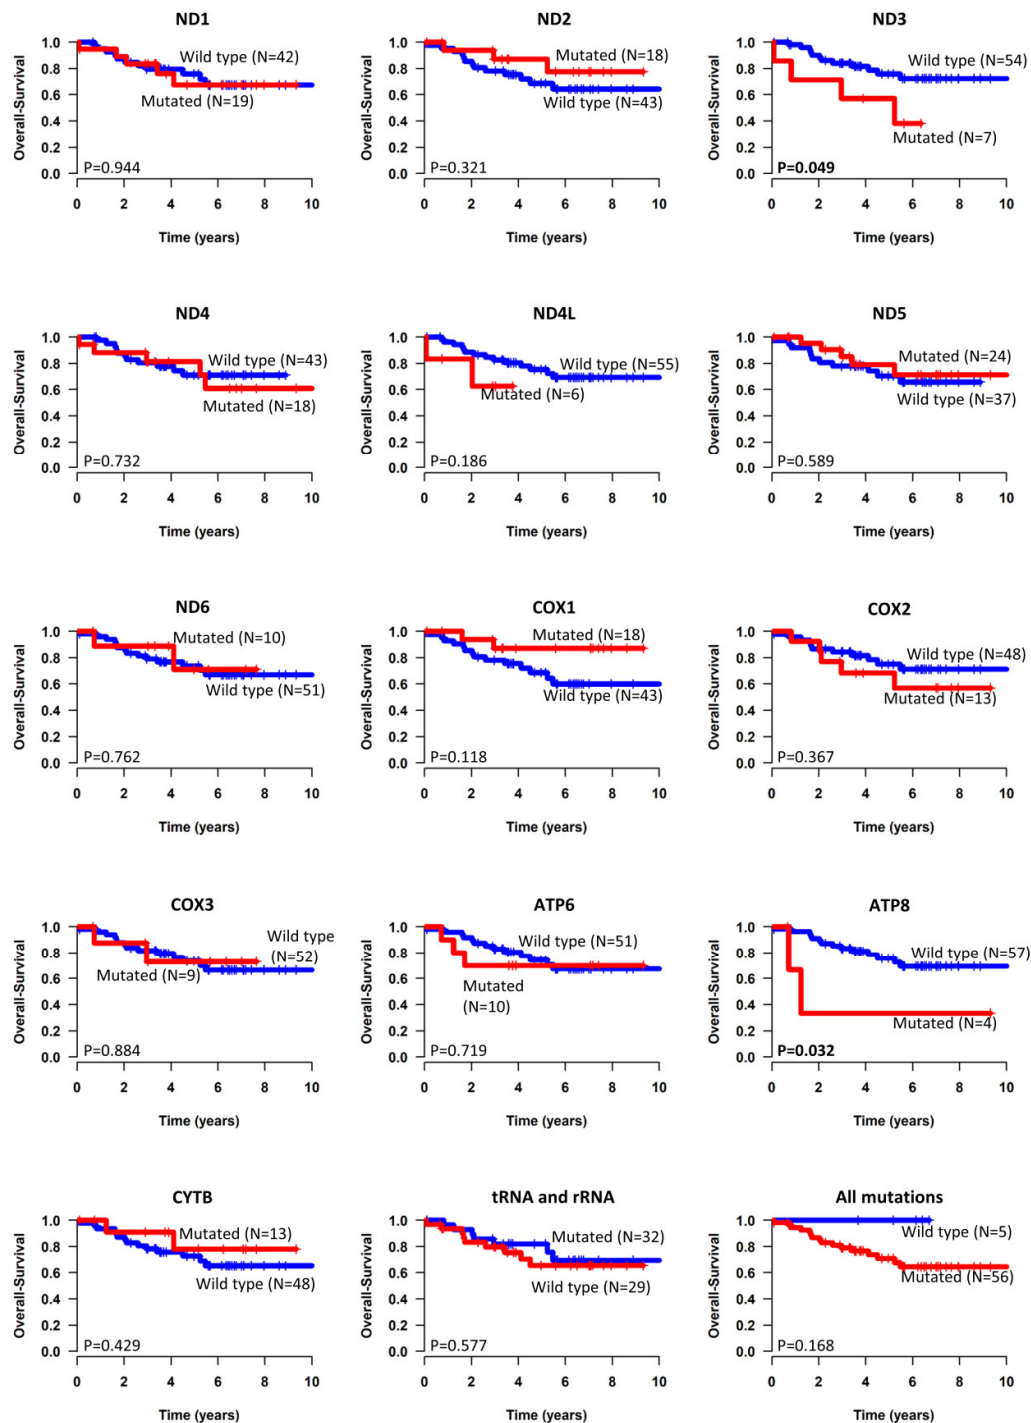

**Figure S17:** Kaplan-Meier estimation of overall survival of stage-I lung adenocarcinoma patients for mutations in individual mitochondrial genes and regions.

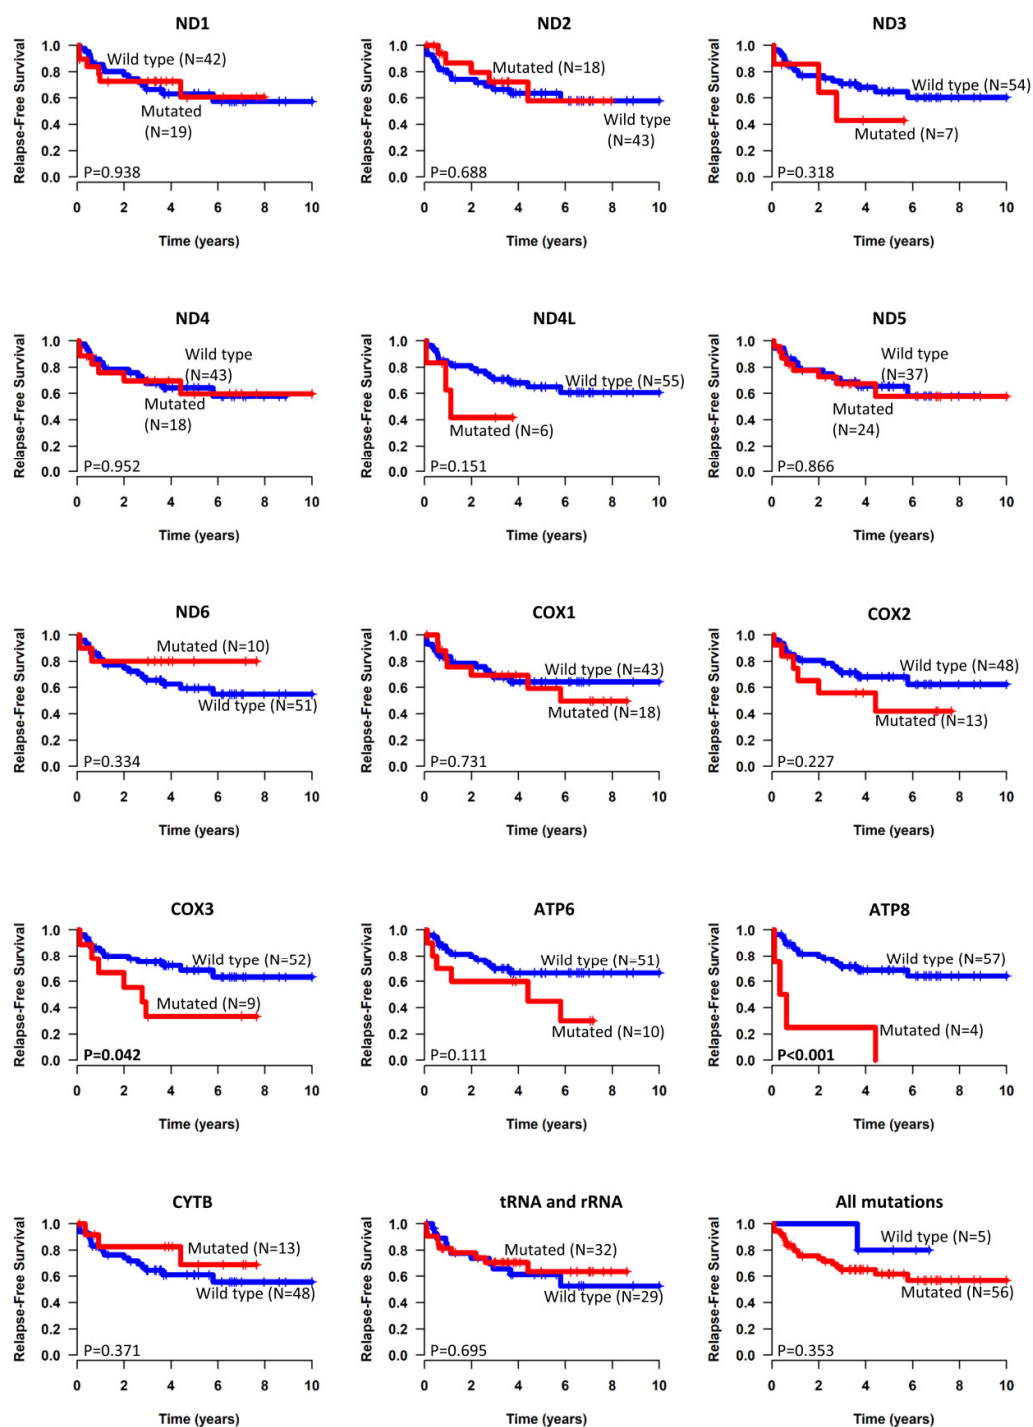

**Figure S18:** Kaplan-Meier estimation of Relapse-free survival of early stage lung adenocarcinoma patients for mutations in individual mitochondrial genes.

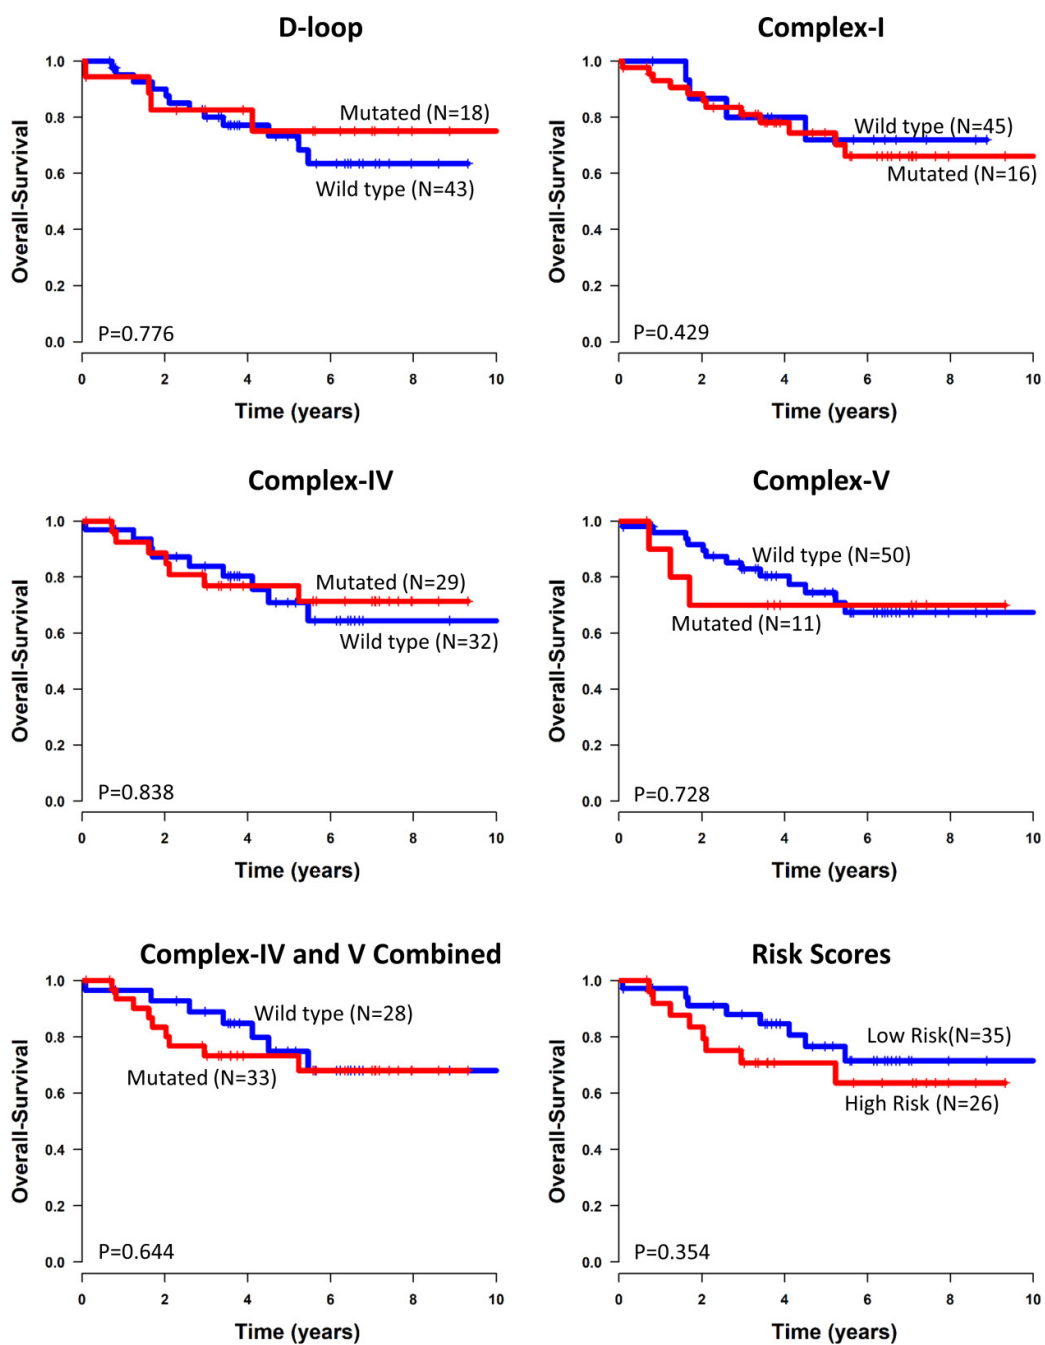

**Figure S19:** Kaplan-Meier estimation of overall survival of early stage lung adenocarcinoma patients for mutations in D-loop region and mitochondrial encoded OXPHOS complex genes.

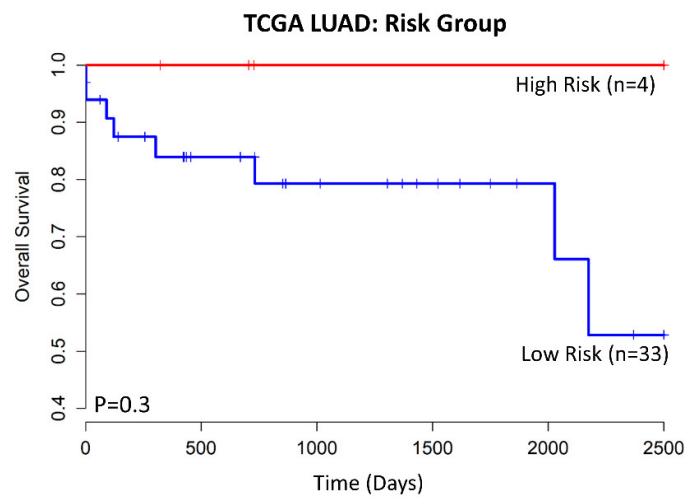

**Figure S20:** Kaplan-Meier estimation of overall survival for LUAD\_TCGA cohort.
